# Supplementary material for: Evaluation of Different Oligonucleotide Base Substitutions at CpG Binding sites in Multiplex Bisulfite-PCR sequencing
Source: PubMed Central journal article supplement (PMC5361148; doi:10.1038/srep45096), 2017-03-22
Supplement: srep45096-s1.pdf [file srep45096-s1.pdf]

**SuppTable 1: Primers where the base modification is designed in either a single or both primers**

| Forward Primer Name* | Forward Primer Sequence*             | Reverse Primer Name | Reverse Primer Sequence            |
|----------------------|--------------------------------------|---------------------|------------------------------------|
| M209_dI              | 5'-gGTTGGTATt-dI-gGtTttAGGG-3'       | M210                | 5'-AaaACCTaaACATCCTaaaCCTT-3'      |
| M209_Y               | 5'-gGTTGGTATtYgGtTttAGGG-3'          |                     |                                    |
| M209_dS              | 5'-gGTTGGTATt-dS-gGtTttAGGG-3'       |                     |                                    |
| M209_5Ni             | 5'-gGTTGGTATt-5Ni-gGtTttAGGG-3'      |                     |                                    |
| M213_dI              | 5'-GAGt-dI-gAGATTTGGGtTtTGAAG-3'     | M214                | 5'-TCTTTaCCACTaCTAAaATTACC-3'      |
| M213_Y               | 5'-GAGtYgAGATTTGGGtTtTGAAG-3'        |                     |                                    |
| M213_dS              | 5'-GAGt-dS-gAGATTTGGGtTtTGAAG-3'     |                     |                                    |
| M213_5Ni             | 5'-GAGt-5Ni-gAGATTTGGGtTtTGAAG-3'    |                     |                                    |
| M215_dI              | 5'-tAtTG-dI-gttttATtTGGAtTGAaATG-3'  | M216                | 5'-TTaATCCTaCATCTaAACACCC-3'       |
| M215_Y               | 5'-tAtTG-Y-gttttATtTGGAtTGAaATG-3'   |                     |                                    |
| M215_dS              | 5'-tAtTG-dS-gttttATtTGGAtTGAaATG-3'  |                     |                                    |
| M215_5Ni             | 5'-tAtTG-5Ni-gttttATtTGGAtTGAaATG-3' |                     |                                    |
| M217_dI              | 5'-TtTGA-dI-gttAAGGAGttAGttAGA-3'    | M218_dI             | 5'-c-dI-TaTCCTCCCTTTaTTaTaaCTC-3'  |
| M217_Y               | 5'-TtTGAYgttAAGGAGttAGttAGA-3'       | M218_R              | 5'-cR-TaTCCTCCCTTTaTTaTaaCTC-3'    |
| M217_dS              | 5'-TtTGA-dS-gttAAGGAGttAGttAGA-3'    | M218_dS             | 5'-c-dS-TaTCCTCCCTTTaTTaTaaCTC-3'  |
| M217_5Ni             | 5'-TtTGA-5Ni-gttAAGGAGttAGttAGA-3'   | M218_Ni             | 5'-c-5Ni-TaTCCTCCCTTTaTTaTaaCTC-3' |
| M219_dI              | 5'-tTAttTGtttA-dI-gttAGATGGGG-3'     | M220_dI             | 5'-c-dI-aAaaTaaaTaCACTCCACCTCT-3'  |
| M219_Y               | 5'-tTAttTGtttAYgttAGATGGGG-3'        | M220_R              | 5'-cRaAaaTaaaTaCACTCCACCTCT-3'     |
| M219_dS              | 5'-tTAttTGtttA-dS-gttAGATGGGG-3'     | M220_dS             | 5'-c-dS-aAaaTaaaTaCACTCCACCTCT-3'  |
| M219_5Ni             | 5'-tTAttTGtttA-5Ni-gttAGATGGGG-3'    | M220_Ni             | 5'-c-5Ni-aAaaTaaaTaCACTCCACCTCT-3' |
| M221_dI              | 5'-GGtA-dI-gGGATGGAGTGAAAG-3'        | M222_Di             | 5'-CCTCCAATc-dI-AATCCCAAATT-3'     |
| M221_Y               | 5'-GGtAYGggatggagtgaaag-3'           | M222_R              | 5'-CCTCCAATcRAATCCCAAATT-3'        |
| M221_dS              | 5'-GGtA-dS-gGGATGGAGTGAAAG-3'        | M222_dS             | 5'-CCTCCAATc-dS-AATCCCAAATT-3'     |
| M221_5Ni             | 5'-GGtA-5Ni-gGGATGGAGTGAAAG-3'       | M222_Ni             | 5'-CCTCCAATc-5Ni-AATCCCAAATT-3'    |
| M201                 | 5'-GAttAAGAtTtAGGGAAtATTGAGA-3'      | M202                | 5'-TaCACCTCCCCAaCCCAT-3'           |
| M203                 | 5'-GATTGGATTGGGTTGtATTGAA-3'         | M204                | 5'-CCTCCTCTaaCCATaCATaTTT-3'       |
| M205                 | 5'-GGAAAGTTGAGGTAGAGtATG-3'          | M206                | 5'-CTCCCTCCTCCAaACAC-3'            |

\*Modified base within the primer: dI – deoxyinosine, Y/R – mixed-bases (Y – C and T, R – G and A), dS – abasic, 5Ni – 5-Nitroindole

**SuppTable 2: Primers where the base modification is designed near either the 5' or the centre of the forward primer**

| Forward Primer Name* | Forward Primer Sequence*            | Reverse Primer Name | Reverse Primer Sequence         |
|----------------------|-------------------------------------|---------------------|---------------------------------|
| C601_dl              | 5'-gGGTAGGG-dl-gGAGGTATT-3'         |                     |                                 |
| C601_Y               | 5'-gGGTAGGGYgGAGGTATT-3'            |                     |                                 |
| C601_dS              | 5'-Gggtagggg-dS-gGAGGTATT-3'        | C602                | 5'-AaCTCTCCATTaCTCTaACA-3'      |
| C601_5Ni             | 5'-gGGTAGGG-5Ni-gGAGGTATT-3'        |                     |                                 |
| C603_dl              | 5'-AGGGGtTG-dl-gGGGAAAGG-3'         |                     |                                 |
| C603_Y               | 5'-AGGGGtTGYgGGGAAAGG-3'            |                     |                                 |
| C603_dS              | 5'-AGGGGtTG-dS-gGGGAAAGG-3'         | C604                | 5'-aTCAaCCCCTCTTTaaCTTC-3'      |
| C603_5Ni             | 5'-AGGGGtTG-5Ni-gGGGAAAGG-3'        |                     |                                 |
| C605_dl              | 5'-AAGGGtAG-dl-gGGGTGATG-3'         |                     |                                 |
| C605_Y               | 5'-AAGGGtAGYgGGGTGATG-3'            |                     |                                 |
| C605_dS              | 5'-AAGGGtAG-dS-gGGGTGATG-3'         | C606                | 5'-TCACAaATaCCCCTTTCCC-3'       |
| C605_5Ni             | 5'-AAGGGtAG-5Ni-gGGGTGATG-3'        |                     |                                 |
| C607_dl              | 5'-gGGAGTGG-dl-gAGGGTTTA-3'         |                     |                                 |
| C607_Y               | 5'-gGGAGTGGYgAGGGTTTA-3'            |                     |                                 |
| C607_dS              | 5'-gGGAGTGG-dS-gAGGGTTTA-3'         | C608                | 5'-CAaCCTCCCAaCTaaCCAC-3'       |
| C607_5Ni             | 5'-gGGAGTGG-5Ni-gAGGGTTTA-3'        |                     |                                 |
| C609_dl              | 5'-GGAGAGtT-dl-gAGGGGAGG-3'         |                     |                                 |
| C609_Y               | 5'-GGAGAGtTYgAGGGGAGG-3'            |                     |                                 |
| C609_dS              | 5'-GGAGAGtT-dS-gAGGGGAGG-3'         | C610                | 5'-aTCCACCCCTCAaTTCAC-3'        |
| C609_5Ni             | 5'-GGAGAGtT-5Ni-gAGGGGAGG-3'        |                     |                                 |
| C611_dl              | 5'-CCTc-dl-TaCCAATAATTTAACTTC-3'    |                     |                                 |
| C611_R               | 5'-CCTcR-TaCCAATAATTTAACTTC-3'      |                     |                                 |
| C611_dS              | 5'-CCTc-dS-TaCCAATAATTTAACTTC-3'    | C612                | 5'-ttAGGGTAGATGTGGGAAAG-3'      |
| C611_5Ni             | 5'-CCTc-5Ni-TaCCAATAATTTAACTTC-3'   |                     |                                 |
| C613_dl              | 5'-TtAAT-dl-gTGTGGGtATGTTTtATTA-3'  |                     |                                 |
| C613_Y               | 5'-TtAATYgTGTGGGtATGTTTtATTA-3'     |                     |                                 |
| C613_dS              | 5'-TtAAT-dS-gTGTGGGtATGTTTtATTA-3'  | C614                | 5'-CTTTaTTTTCTTACCTTAAACAT-3'   |
| C613_5Ni             | 5'-TtAAT-5Ni-gTGTGGGtATGTTTtATTA-3' |                     |                                 |
| C615_dl              | 5'-TCc-dl-aaaCTCCTaaAACCTTTAC-3'    |                     |                                 |
| C615_R               | 5'-TCcRaaaCTCCTaaAACCTTTAC-3'       |                     |                                 |
| C615_5Ni             | 5'-TCc-5Ni-aaaCTCCTaaAACCTTTAC-3'   | C616                | 5'-ttTtAAGtAGtAGAAAtAGGA-3'     |
| C615_dS              | 5'-TCc-dS-aaaCTCCTaaAACCTTTAC-3'    |                     |                                 |
| C617_dl              | 5'-ACCTc-dl-aAaaAaCTTCTaCTAATTC-3'  |                     |                                 |
| C617_R               | 5'-ACCTcRaAaaAaCTTCTaCTAATTC-3'     |                     |                                 |
| C617_dS              | 5'-ACCTc-dS-aAaaAaCTTCTaCTAATTC-3'  | C618                | 5'-TGGAAtttAGGtTGTGAGAG-3'      |
| C617_5Ni             | 5'-ACCTc-5Ni-aAaaAaCTTCTaCTAATTC-3' |                     |                                 |
| C619_dl              | 5'-CTCTc-dl-TaAACATTCAAaACAAAAC-3'  |                     |                                 |
| C619_R               | 5'-CTCTcRTAACATTCAAaACAAAAC-3'      |                     |                                 |
| C619_dS              | 5'-CTCTc-dS-TaAACATTCAAaACAAAAC-3'  | C620                | 5'-ttTTGtttATTTAGtTGAtTAGGAA-3' |
| C619_5Ni             | 5'-CTCTc-5Ni-TaAACATTCAAaACAAAAC-3' |                     |                                 |
| C379                 | 5'-TaaaCTTTTaaTaaAaaAaaAaCAATCAT-3' | C380                | 5'-GGTGGTTGTGAAttAGGGA-3'       |
| C383                 | 5'-aCTaaaaCCACAaCCCCAAC-3'          | C384                | 5'-tTTGGGAtAAAGGtttAtTGAG-3'    |
| C527                 | 5'-AATAttAGtTGGAAAGTTAATGAAT-3'     | C528                | 5'-aCACTTCCACTCCACC-3'          |

\*Modified base within the primer: dl – deoxyinosine, Y/R – mixed-bases (Y – C and T, R – G and A), dS – abasic, 5Ni – 5-Nitroindole

# Evaluation of Different Oligonucleotide Base Substitutions at CpG Binding sites in Multiplex Bisulfite-PCR sequencing

Jennifer Lu, Kelin Ru, Ida Candiloro, Alexander Dobrovic, Darren Korbie, Matt Trau

**SuppTable 3: Summary of mean and standard deviation (SD) of CpG methylation sites across all the amplicons generated with primers that had the four modified bases.**

|                                | deoxyinosine |       |      | mixed-base |       |      | 5-nitroindole |       |       | abasic |       |      |
|--------------------------------|--------------|-------|------|------------|-------|------|---------------|-------|-------|--------|-------|------|
|                                | n*           | mean  | SD   | n*         | mean  | SD   | n*            | mean  | SD    | n*     | mean  | SD   |
| <b>100% Methylated Control</b> |              |       |      |            |       |      |               |       |       |        |       |      |
| Modified Primers               | 9            | 88.43 | 2.29 | 9          | 87.51 | 2.81 | 9             | 88.49 | 2.53  | 9      | 78.47 | 6.24 |
| CpG-free Control Primers       | 23           | 86.65 | 3.11 | 23         | 85.66 | 3.24 | 23            | 85.38 | 4.05  | 23     | 84.94 | 5.00 |
| Modified Primers               | 15           | 87.86 | 6.16 | 15         | 87.53 | 6.43 | 15            | 38.71 | 40.30 | 6      | 88.47 | 3.91 |
| CpG-free Control Primers       | 15           | 87.18 | 3.30 | 15         | 87.43 | 3.64 | 15            | 87.86 | 4.46  | 15     | 86.71 | 4.45 |
| <b>75% Methylated Control</b>  |              |       |      |            |       |      |               |       |       |        |       |      |
| Modified Primers               | 9            | 63.03 | 2.51 | 9          | 67.11 | 2.15 | 9             | 68.62 | 2.36  | 9      | 71.56 | 5.93 |
| CpG-free Control Primers       | 23           | 59.19 | 3.56 | 23         | 60.26 | 2.71 | 23            | 62.94 | 2.87  | 23     | 63.14 | 3.20 |
| Modified Primers               | 15           | 53.40 | 8.00 | 15         | 67.19 | 3.64 | 15            | 78.55 | 12.00 | 15     | 79.47 | 9.62 |
| CpG-free Control Primers       | 15           | 60.70 | 4.03 | 15         | 64.22 | 2.97 | 15            | 66.32 | 5.33  | 15     | 67.89 | 4.70 |
| <b>50% Methylated Control</b>  |              |       |      |            |       |      |               |       |       |        |       |      |
| Modified Primers               | 9            | 42.66 | 4.22 | 9          | 51.83 | 3.26 | 9             | 44.59 | 1.26  | 2      | 39.17 | 0.20 |
| CpG-free Control Primers       | 23           | 41.03 | 5.44 | 23         | 46.28 | 1.66 | 23            | 43.74 | 1.93  | 23     | 43.24 | 2.24 |
| Modified Primers               | 15           | 39.84 | 2.48 | 15         | 43.64 | 3.06 | 15            | 56.90 | 11.46 | 6      | 44.30 | 2.35 |
| CpG-free Control Primers       | 15           | 43.47 | 4.30 | 15         | 44.11 | 4.19 | 15            | 43.61 | 3.32  | 15     | 45.42 | 4.36 |
| <b>25% Methylated Control</b>  |              |       |      |            |       |      |               |       |       |        |       |      |
| Modified Primers               | 9            | 22.66 | 3.45 | 9          | 26.11 | 1.71 | 9             | 24.84 | 2.44  | 9      | 31.34 | 6.97 |
| CpG-free Control Primers       | 23           | 21.86 | 1.44 | 23         | 18.64 | 3.23 | 23            | 23.16 | 1.31  | 23     | 24.51 | 1.54 |
| Modified Primers               | 15           | 18.84 | 2.58 | 15         | 22.19 | 1.92 | 6             | 25.97 | 1.51  | 6      | 21.81 | 1.57 |
| CpG-free Control Primers       | 15           | 22.40 | 3.30 | 15         | 19.82 | 1.82 | 15            | 22.81 | 1.64  | 15     | 22.54 | 2.33 |
| <b>0% Methylated Control</b>   |              |       |      |            |       |      |               |       |       |        |       |      |
| Modified Primers               | 9            | 1.45  | 0.50 | 9          | 1.60  | 0.58 | 9             | 1.61  | 0.35  | 2      | 0.67  | 0.02 |
| CpG-free Control Primers       | 23           | 1.42  | 0.59 | 23         | 1.53  | 0.63 | 23            | 1.61  | 0.78  | 23     | 1.60  | 0.49 |
| Modified Primers               | 15           | 1.48  | 0.68 | 15         | 1.33  | 0.68 | 6             | 1.54  | 0.55  | 15     | 3.22  | 1.95 |
| CpG-free Control Primers       | 15           | 1.42  | 0.42 | 15         | 1.27  | 0.33 | 15            | 1.34  | 0.40  | 15     | 1.82  | 0.66 |

\*n: number of CpG sites in total

**SuppTable 4: Summary of mean and standard deviation (SD) of CpG methylation sites across amplicons generated using primers where the modified base is positioned differently within the primer(s).**

|                                | deoxyinosine |       |      | mixed-base |       |      |
|--------------------------------|--------------|-------|------|------------|-------|------|
|                                | n*           | mean  | SD   | n*         | mean  | SD   |
| <b>100% Methylated Control</b> |              |       |      |            |       |      |
| CpG near 5' end                | 8            | 88.25 | 3.61 | 8          | 87.87 | 3.93 |
| near centre of primer          | 15           | 87.55 | 2.62 | 15         | 87.27 | 2.95 |
| CpG-free control               | 23           | 86.65 | 3.11 | 23         | 85.66 | 3.24 |
| CpG near 5' end                | 27           | 86.97 | 5.66 | 27         | 88.62 | 5.49 |
| CpG in both primers            | 23           | 88.62 | 4.88 | 23         | 88.16 | 4.05 |
| CpG-free control               | 15           | 87.18 | 3.30 | 15         | 87.43 | 3.64 |
| <b>75% Methylated Control</b>  |              |       |      |            |       |      |
| CpG near 5' end                | 8            | 64.77 | 3.27 | 8          | 68.67 | 3.32 |
| near centre of primer          | 15           | 65.07 | 3.89 | 15         | 71.00 | 8.42 |
| CpG-free control               | 23           | 59.19 | 3.56 | 23         | 60.26 | 2.71 |
| CpG near 5' end                | 27           | 50.38 | 7.20 | 27         | 67.83 | 3.30 |
| CpG in both primers            | 23           | 62.15 | 4.43 | 23         | 64.01 | 4.60 |
| CpG-free control               | 15           | 60.70 | 4.03 | 15         | 64.22 | 2.97 |
| <b>50% Methylated Control</b>  |              |       |      |            |       |      |
| CpG near 5' end                | 8            | 44.17 | 1.89 | 8          | 46.30 | 2.04 |
| near centre of primer          | 15           | 45.32 | 4.74 | 15         | 52.47 | 6.14 |
| CpG-free control               | 23           | 41.03 | 5.44 | 23         | 46.28 | 1.66 |
| CpG near 5' end                | 27           | 34.46 | 6.46 | 27         | 44.23 | 2.55 |
| CpG in both primers            | 23           | 41.93 | 5.81 | 23         | 43.92 | 3.25 |
| CpG-free control               | 15           | 43.47 | 4.30 | 15         | 44.11 | 4.19 |
| <b>25% Methylated Control</b>  |              |       |      |            |       |      |
| CpG near 5' end                | 8            | 24.07 | 1.20 | 8          | 24.01 | 1.28 |
| near centre of primer          | 15           | 25.27 | 4.36 | 15         | 26.00 | 1.49 |
| CpG-free control               | 23           | 21.86 | 1.44 | 23         | 18.64 | 3.23 |
| CpG near 5' end                | 27           | 15.24 | 4.57 | 27         | 23.96 | 2.51 |
| CpG in both primers            | 23           | 18.30 | 3.62 | 23         | 21.39 | 5.04 |
| CpG-free control               | 15           | 22.40 | 3.30 | 15         | 19.82 | 1.82 |
| <b>0% Methylated Control</b>   |              |       |      |            |       |      |
| CpG near 5' end                | 8            | 1.59  | 0.48 | 8          | 1.19  | 0.26 |
| near centre of primer          | 15           | 1.82  | 0.96 | 15         | 1.92  | 0.93 |
| CpG-free control               | 23           | 1.42  | 0.59 | 23         | 1.53  | 0.63 |
| CpG near 5' end                | 27           | 1.36  | 0.60 | 27         | 1.29  | 0.65 |
| CpG in both primers            | 23           | 1.66  | 0.84 | 23         | 1.89  | 0.84 |
| CpG-free control               | 15           | 1.42  | 0.42 | 15         | 1.27  | 0.33 |

\*n: number of CpG sites in total

**SuppTable 5: Summary of mean and standard deviation (SD) of CpG methylation sites across different assay conditions.**

|                            |             | Percentage Methylation (%) |       |       |       |       |
|----------------------------|-------------|----------------------------|-------|-------|-------|-------|
|                            |             | 100                        | 75    | 50    | 25    | 0     |
| <b>No Modifications</b>    |             |                            |       |       |       |       |
| <b>Assay 1 (n* = 21)</b>   | <b>Mean</b> | 96.48                      | 79.96 | 62.24 | 30.37 | 15.05 |
|                            | <b>SD</b>   | 1.05                       | 11.28 | 16.38 | 12.72 | 9.20  |
| <b>Assay 2 (n* = 51)</b>   | <b>Mean</b> | 97.55                      | 63.87 | 46.68 | 15.00 | 11.73 |
|                            | <b>SD</b>   | 1.67                       | 15.55 | 14.91 | 5.61  | 6.88  |
| <b>Assay 3 (n* = 22)</b>   | <b>Mean</b> | 97.40                      | 72.16 | 50.27 | 24.22 | 11.95 |
|                            | <b>SD</b>   | 1.00                       | 6.10  | 5.21  | 3.70  | 5.18  |
| <b>Single Modification</b> |             |                            |       |       |       |       |
| <b>Assay 1 (n* = 35)</b>   | <b>Mean</b> | 97.01                      | 89.13 | 79.50 | 41.57 | 19.16 |
|                            | <b>SD</b>   | 1.83                       | 4.45  | 11.14 | 18.18 | 15.47 |
| <b>Assay 2 (n* = 40)</b>   | <b>Mean</b> | 98.26                      | 83.20 | 62.67 | 19.49 | 15.34 |
|                            | <b>SD</b>   | 1.23                       | 11.04 | 19.93 | 11.06 | 9.40  |
| <b>Assay 3 (n* = 36)</b>   | <b>Mean</b> | 97.24                      | 72.78 | 51.55 | 22.94 | 12.90 |
|                            | <b>SD</b>   | 1.07                       | 6.83  | 6.30  | 8.43  | 7.53  |
| <b>Double Modification</b> |             |                            |       |       |       |       |
| <b>Assay 1 (n* = 23)</b>   | <b>Mean</b> | 97.04                      | 89.60 | 76.90 | 56.42 | 18.74 |
|                            | <b>SD</b>   | 1.24                       | 9.72  | 16.82 | 26.78 | 10.85 |
| <b>Assay 2 (n* = 108)</b>  | <b>Mean</b> | 97.96                      | 88.33 | 70.35 | 28.54 | 18.88 |
|                            | <b>SD</b>   | 1.75                       | 4.61  | 13.28 | 16.55 | 15.11 |
| <b>Assay 3 (n* = 24)</b>   | <b>Mean</b> | 97.94                      | 70.62 | 51.43 | 25.84 | 15.75 |
|                            | <b>SD</b>   | 0.76                       | 9.73  | 7.59  | 9.31  | 7.08  |

\*n: number of CpG sites in total; Conditions of different assays are as summarised in SuppFigure 3

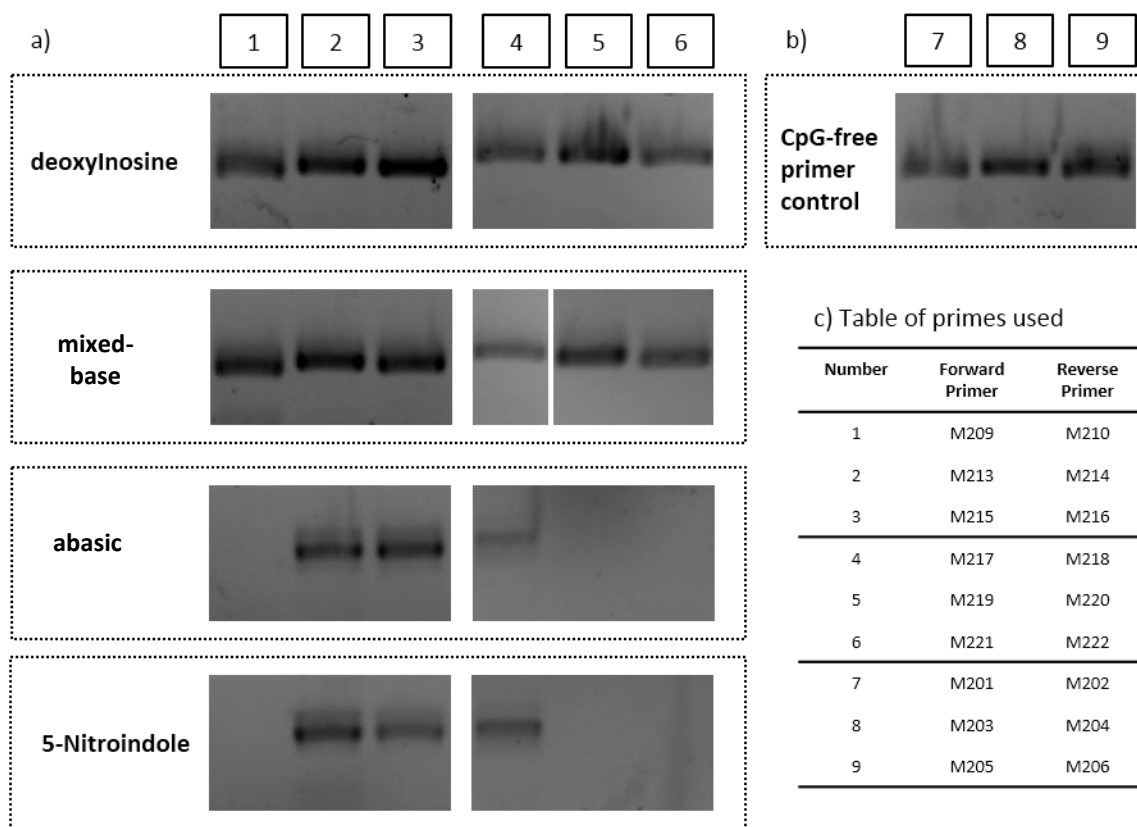

**SuppFigure 1: Validation of primer pairs performed using singleplex bisulfite PCR.** a) Amplicons generated using primers where only one modification is designed in the forward primer (**lanes 1-3**) or a modification is designed in both the forward and reverse primer (**lanes 4-6**). While primer pairs with either deoxyinosine or mixed-base modifications produced amplicons regardless of the number of modifications, amplification using abasic- and 5-Nitroindole-modified primers were 'unpredictable'. b) amplicons generated using 'CpG-free' control primers indicated that the results produced in (a) were reliable and not as a result of foreign factors. c) Table of all the primers where the primers corresponding to the lane numbers in (a) and (b) are listed.

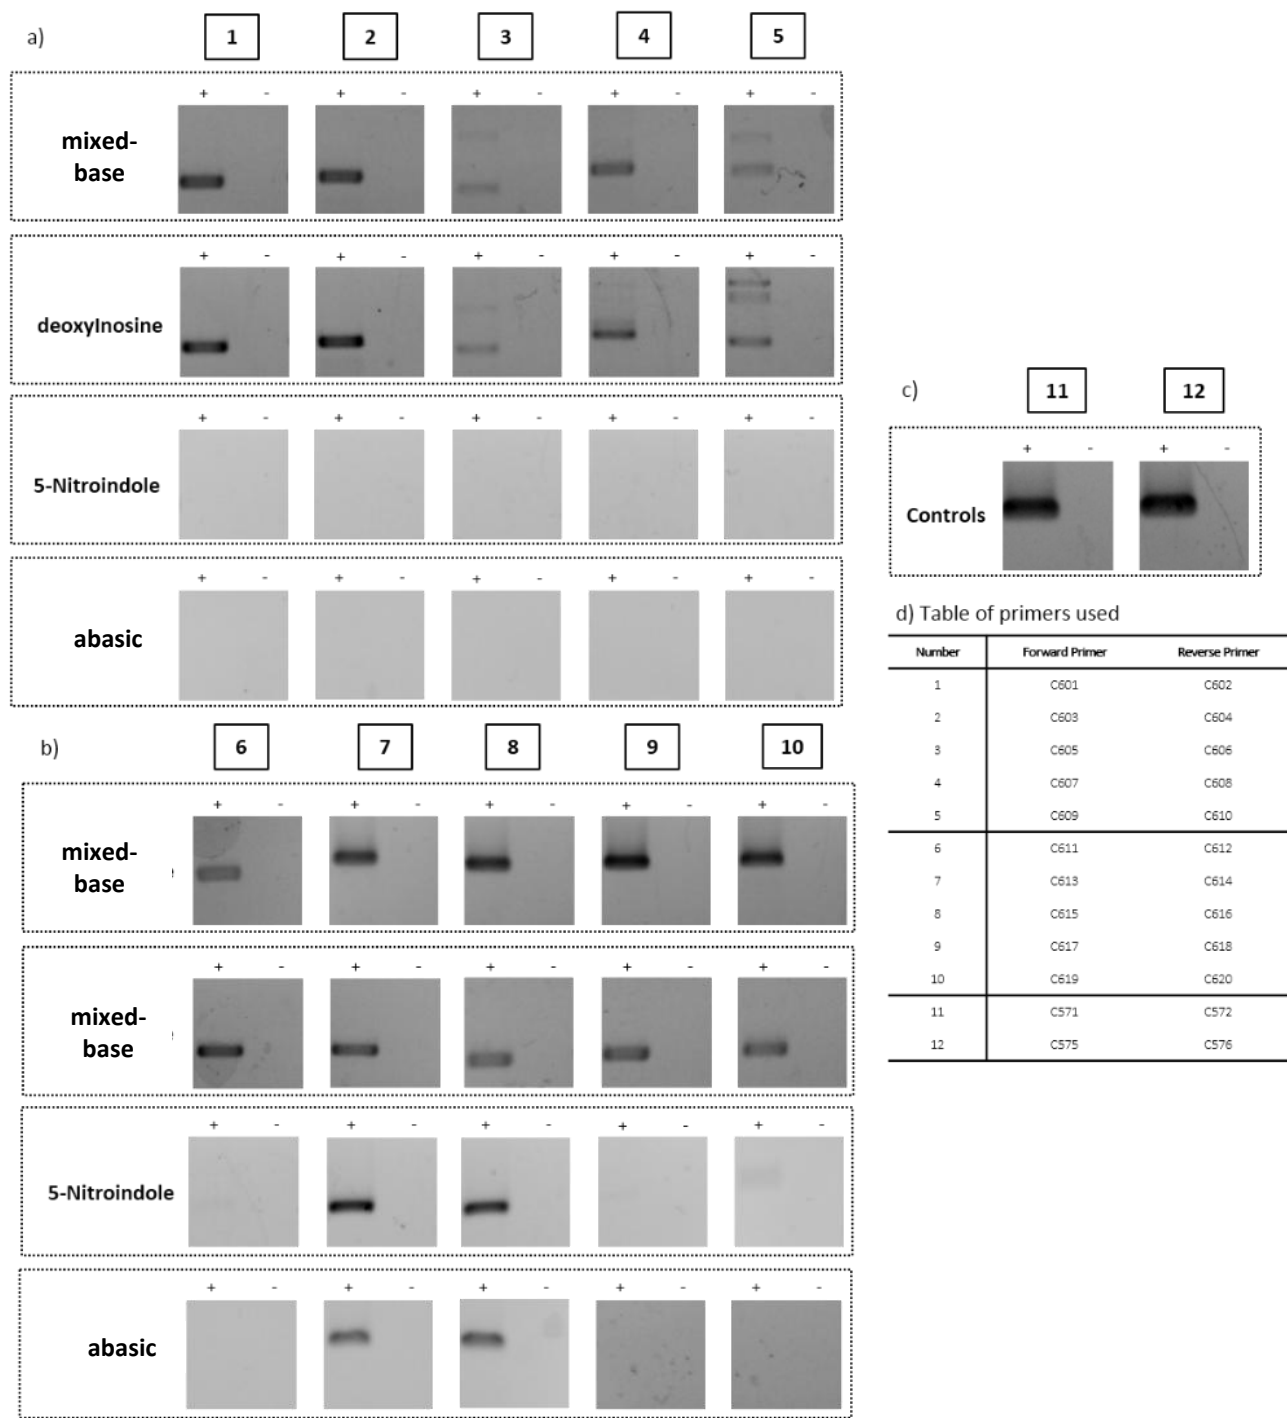

**SuppFigure 2: Validation of primer pairs using singleplex bisulfite PCR.** **a)** Primer screen of primers where the modification is located near the centre of the forward primer. While primers with mixed-base or deoxyinosine modifications were able to produce products, primers with 5-nitroindole or abasic near the centre of the primer universally failed. **b)** Primer screen of primers where the modification is located near the 5' terminus of the forward primer. All primers which had a mixed-base or deoxyinosine modification near the 5' end of the forward primer produced products, while only two primer pairs with a 5-nitroindole or abasic near the 5' terminus produced amplicons, which suggests that the latter two modifications is not as stable as the former in bisulfite screening. **c)** Screening of 'CpG-free' primers during bisulfite PCR. All validation was performed on bisulfite-converted blood pool DNA. **d)** a table of all the primers where the primers corresponding to the lane numbers in (a), (b) and (c) are listed.

# Evaluation of Different Oligonucleotide Base Substitutions at CpG Binding sites in Multiplex Bisulfite-PCR sequencing

Jennifer Lu, Kelin Ru, Ida Candiloro, Alexander Dobrovic, Darren Korbie, Matt Trau

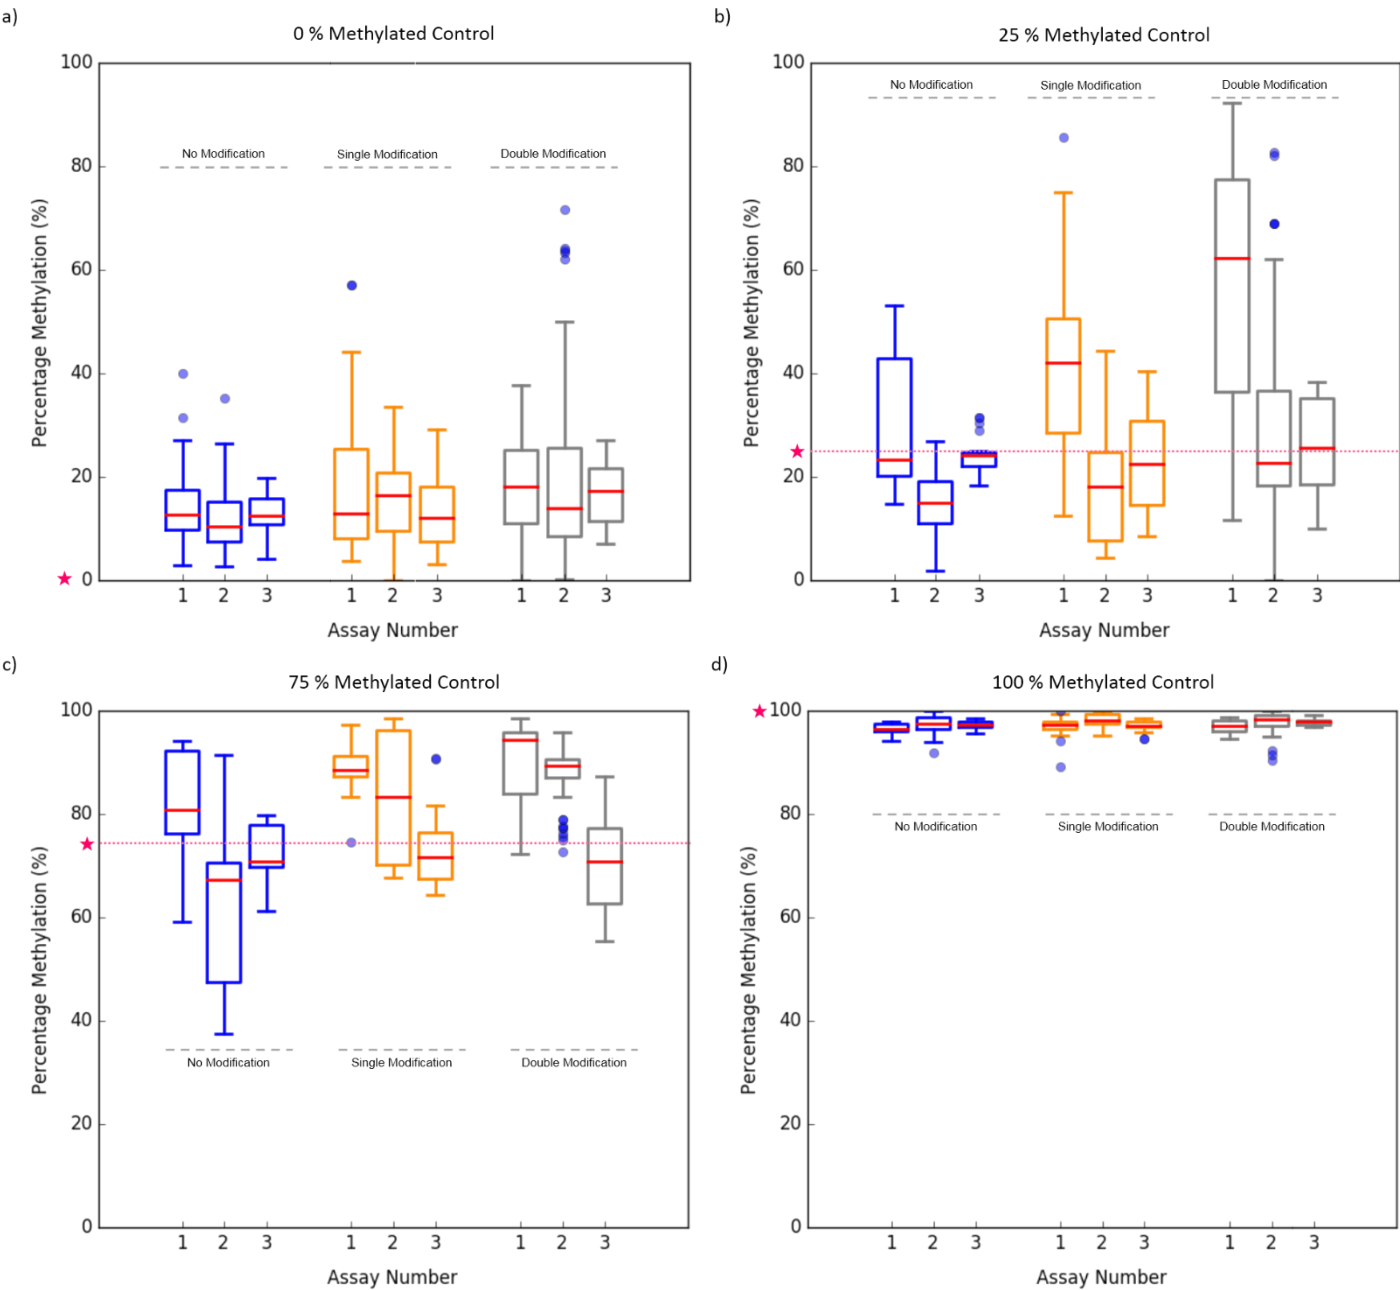

e)

| Assay Number | Modifications |    |     | [primer] (nM) | Tm (°C) |
|--------------|---------------|----|-----|---------------|---------|
|              | 0             | 1  | 2   |               |         |
| 1            | 21            | 35 | 23  | 18            | 60      |
| 2            | 50            | 39 | 107 | 18            | 60      |
| 3            | 21            | 35 | 23  | 23            | 57      |

**SuppFigure 3: Summary of methylation analysis of different graduated methylation profiles using different assay conditions.** Summary of multiplex bisulfite PCR screening of amplicons generated using primers with 'no modification' (both the forward and reverse primers have no CpG sites), 'single modification' (a single CpG site in either the forward or reverse primer) or double modification (a CpG site within both the forward and reverse primer) of four different graduated methylation controls (0%, 25%, 75% and 100%) shown in a - d. Optimal level of methylation for each methylated control is indicated with ★ along the y axis. e) Summary of assay conditions including primer concentrations (in nM) and annealing temperature (of the PCR).
